# Supplementary material for: Competitive coordination of the dual roles of the Hedgehog co-receptor in homophilic adhesion and signal reception
Source: eLife. 2021 May 18;10:e65770. doi: 10.7554/eLife.65770 (PMC8131103; doi:10.7554/eLife.65770)
Supplement: Figure 1—source data 1. [file elife-65770-fig1-data1.xlsx]

## Sheet: Sheet1
Figure 1-source data 1
Sample size (n), mean, Std. Deviation (SD) are presented for the data in Figure 1B, C
Figure 1B: Quantification of the average cytoneme length
Genotype	n	mean	Std. Deviation (SD)
ptc-GAL4>GMA-GFP	30	3.786	1.417
ptc-GAL4>Ihog	30	20.89	7.498
ptc-GAL4>IhogΔFn1	30	4.919	1.917
ptc-GAL4>IhogΔFn2	30	17.91	7.233
ptc-GAL4>IhogxHep	30	4.784	2.177
Dunnett’s multiple comparisons test	Mean Diff.	Summary	Adjusted P Value
GMA-GFP vs. Ihog	-17.1	****	<0.0001
GMA-GFP vs. IhogΔFn1	-1.133	ns	0.9901
GMA-GFP vs. IhogΔFn2	-14.12	****	<0.0001
GMA-GFP vs. IhogxHep	-0.998	ns	0.9963
Figure 1C: Quantification of the average annular structures number per cytoneme
Genotype	n	mean	Std. Deviation (SD)
ptc-GAL4>GMA-GFP	50	0.04	0.1979
ptc-GAL4>Ihog	50	4.24	1.802
ptc-GAL4>IhogΔFn1	50	0.16	0.4677
ptc-GAL4>IhogΔFn2	50	4.16	1.543
ptc-GAL4>IhogxHep	50	0.2	0.5345
Dunnett’s multiple comparisons test	Mean Diff.	Summary	Adjusted P Value
GMA-GFP vs. Ihog	-4.2	****	<0.0001
GMA-GFP vs. IhogΔFn1	-0.12	ns	0.9999
GMA-GFP vs. IhogΔFn2	-4.12	****	<0.0001
GMA-GFP vs. IhogxHep	-0.16	ns	0.9983
