# Supplementary material for: Competitive coordination of the dual roles of the Hedgehog co-receptor in homophilic adhesion and signal reception
Source: eLife. 2021 May 18;10:e65770. doi: 10.7554/eLife.65770 (PMC8131103; doi:10.7554/eLife.65770)
Supplement: Figure 2—source data 1. [file elife-65770-fig2-data1.xlsx]

## Sheet: Sheet1
Figure 2-source data-1
Sample size (n), mean, Std. Deviation (SD) are presented for the data in Figure 2C, D, E, F
Figure 2C
	n	mean	Std. Deviation (SD)
A	30	17.1	6.147
B	30	15.99	5.415
P	30	16.22	5.629
Tukey’s multiple comparisons test	Mean Diff.	Summary	Adjusted P Value
A vs. B	1.111	ns	0.8384
A vs. P	0.8799	ns	0.9114
B vs. P	-0.2314	ns	0.9981
Figure 2D
	n	mean	Std. Deviation (SD)
A	30	3.8	1.69
B	30	4.267	1.837
P	30	4.233	1.675
Tukey’s multiple comparisons test	Mean Diff.	Summary	Adjusted P Value
A vs. B	-0.4667	ns	0.6578
A vs. P	-0.4333	ns	0.7075
B vs. P	0.03333	ns	0.9998
Figure 2E
	n	mean	Std. Deviation (SD)
A	35	19.06	6.596
P	35	21.01	7.312
Two-tailed unpaired t test	Mean Diff.	Summary	P Value
A vs. P	-1.95	ns	0.2472
Figure 2F
	n	mean	Std. Deviation (SD)
A	31	4.355	1.704
P	31	4.194	1.579
Two-tailed unpaired t test	Mean Diff.	Summary	P Value
A vs. P	0.161	ns	0.7005
