# Supplementary material for: Competitive coordination of the dual roles of the Hedgehog co-receptor in homophilic adhesion and signal reception
Source: eLife. 2021 May 18;10:e65770. doi: 10.7554/eLife.65770 (PMC8131103; doi:10.7554/eLife.65770)
Supplement: Figure 6—source data 1. [file elife-65770-fig6-data1.xlsx]

## Sheet: Sheet1
Figure 6-source data 1
Sample size (n), mean, Std. Deviation (SD) are presented for the data in Figure 6C, D
Figure 6C
	n	mean	Std. Deviation (SD)
Ihog-Ihog	30	5.767	0.6261
Ihog-Hh	30	4.567	0.7279
Two-tailed unpaired t test	Mean Diff.	Summary	P Value
Ihog-Ihog vs. Ihog-Hh	1.2	****	<0.0001
Figure 6D
	n	mean	Std. Deviation (SD)
Ihog-Ihog	30	2.833	0.9499
Ihog-Hh	30	0.5667	0.7279
Two-tailed unpaired t test	Mean Diff.	Summary	P Value
Ihog-Ihog vs. Ihog-Hh	2.2663	****	<0.0001
