# Supplementary material for: Competitive coordination of the dual roles of the Hedgehog co-receptor in homophilic adhesion and signal reception
Source: eLife. 2021 May 18;10:e65770. doi: 10.7554/eLife.65770 (PMC8131103; doi:10.7554/eLife.65770)
Supplement: Figure 7—source data 1. [file elife-65770-fig7-data1.xlsx]

## Sheet: Sheet1
Figure 7-source data 1
Sample size (n), mean, Std. Deviation (SD) are presented for the data in Figure 7C
Figure 7C
Total	n	mean	Std. Deviation (SD)
I~I	300	5.8	0.6
I~H	300	4.1	0.7
Two-tailed unpaired t test	Mean Diff.	Summary	P Value
Ihog-Ihog vs. Ihog-Hh	1.7	****	<0.0001
Like	n	mean	Std. Deviation (SD)
I~I	300	2.4	0.9
I~H	300	0.3	0.5
Two-tailed unpaired t test	Mean Diff.	Summary	P Value
Ihog-Ihog vs. Ihog-Hh	2.1	****	<0.0001
